# Supplementary material
Source: Springer Nature journal article supplement (https://www.springermedizin.de/resource/supplementary/12936_2014_3326_MOESM18_ESM.pdf/9545666)
Supplement: MOESM18 [file 9545666]

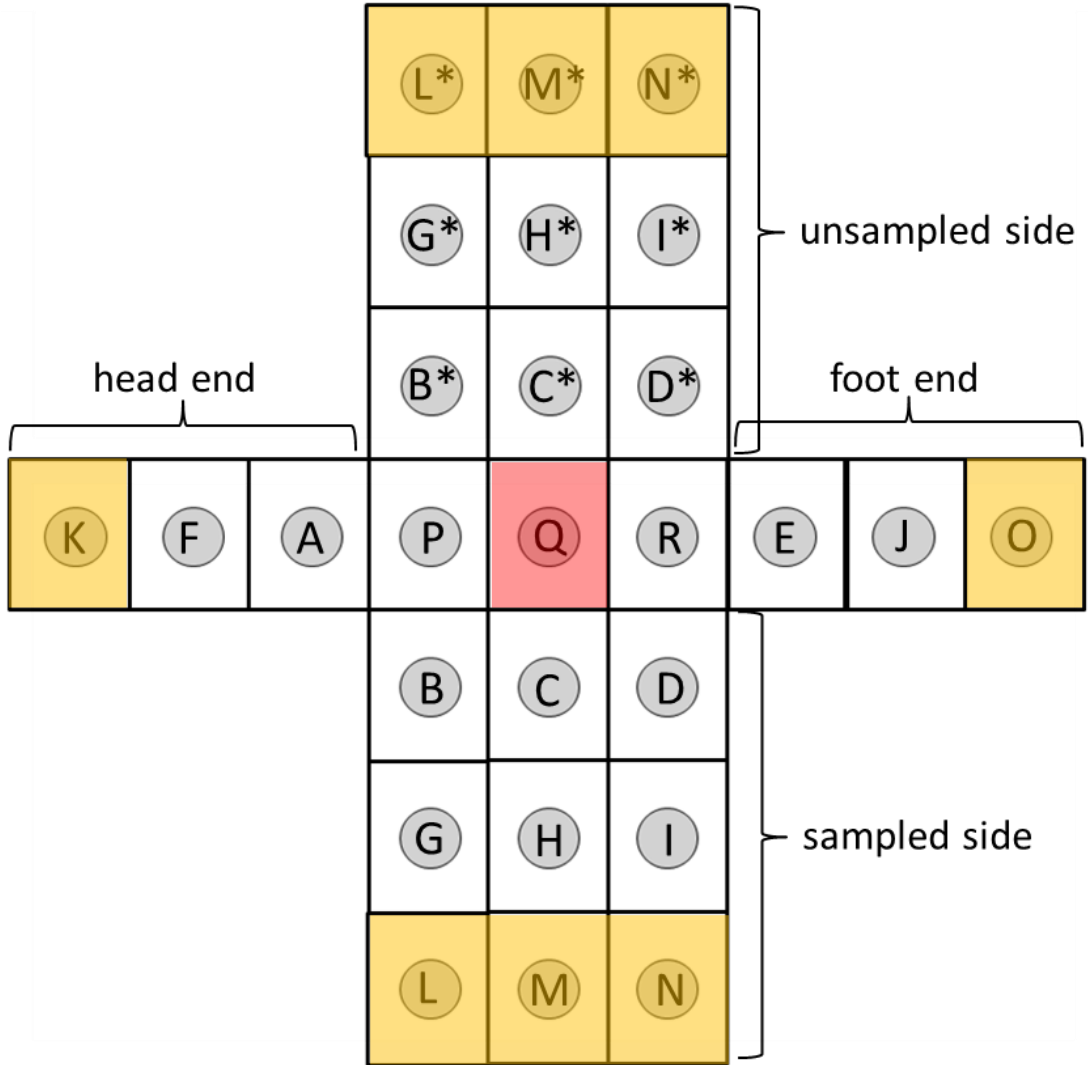

- 1) Determine expected mean catch (= actual mean catch + expected catch on unsampled side\*) for each FA.
- 2) Determine number of sampling locations represented in each FA.
- 3) Divide expected mean catch by number of sampling locations for FA-specific weighting factor

| Functional area number (color) | Expected mean catch | Number of locations | Weighting factor |
|--------------------------------|---------------------|---------------------|------------------|
| 1 (red)                        | 29.5                | 1                   | 29.5             |
| 2 (yellow)                     | 55.1                | 8                   | 6.9              |
| 3 (white)                      | 13.6                | 18                  | 0.7              |

\*Expected mean catch on unsampled side assumed to be the same as on corresponding locations on sampled side
